# Supplementary material for: Site-specific electronic structure of imidazole and imidazolium in aqueous solutions
Source: Royal Society of Chemistry journal article supplement (doi:10.1039/c7cp07885d), 2018-01-01
Supplement: c7cp07885d1.pdf [file c7cp07885d1.pdf]

## Supporting Information

### Site-specific electronic structure of imidazole and imidazolium in aqueous solutions

F. Meyer<sup>1</sup>, M. Blum<sup>2</sup>, A. Benkert<sup>1,3</sup>, D. Hauschild<sup>1,3,4</sup>, Y.L. Jeyachandran<sup>5</sup>, R.G. Wilks<sup>6</sup>, W. Yang<sup>7</sup>, M. Bär<sup>6</sup>, F. Reinert<sup>1</sup>, C. Heske<sup>2,3,4</sup>, M. Zharnikov<sup>5</sup>, and L. Weinhardt<sup>2,3,4\*</sup>

<sup>1</sup>*Universität Würzburg, Experimentelle Physik VII, Am Hubland, 97074 Würzburg, Germany*

<sup>2</sup>*Department of Chemistry and Biochemistry, University of Nevada, Las Vegas (UNLV), 4505 Maryland Parkway, NV 89154-4003, USA*

<sup>3</sup>*Institute for Photon Science and Synchrotron Radiation (IPS), Karlsruhe Institute of Technology (KIT), Hermann-v.-Helmholtz-Platz 1, 76344 Eggenstein-Leopoldshafen, Germany*

<sup>4</sup>*Institute for Chemical Technology and Polymer Chemistry (ITCP), Karlsruhe Institute of Technology (KIT), Engesserstr. 18/20, 76128 Karlsruhe, Germany*

<sup>5</sup>*Angewandte Physikalische Chemie, Universität Heidelberg, Im Neuenheimer Feld 253, 69120 Heidelberg, Germany*

<sup>6</sup>*Renewable Energy, Helmholtz-Zentrum Berlin für Materialien und Energie GmbH, Hahn-Meitner-Platz 1, 14109 Berlin, Germany*

<sup>7</sup>*Advanced Light Source (ALS), Lawrence Berkeley National Laboratory, 1 Cyclotron Road, Berkeley, CA 94720, USA*

\*corresponding author: [lothar.weinhardt@kit.edu](mailto:lothar.weinhardt@kit.edu)

|        | Calculated Orbital Energy (eV) |                                 |
|--------|--------------------------------|---------------------------------|
|        | Imidazole (Im)                 | Imidazolium (ImH <sup>+</sup> ) |
| LUMO+2 | 0.58                           | -4.36                           |
| LUMO+1 | 0.36                           | -5.79                           |
| LUMO   | -0.61                          | -6.89                           |
| HOMO   | -5.81                          | -11.97                          |
| HOMO-1 | -6.31                          | -13.77                          |
| HOMO-2 | -6.98                          | -16.39                          |

Table S1: Calculated orbital energies (in eV).

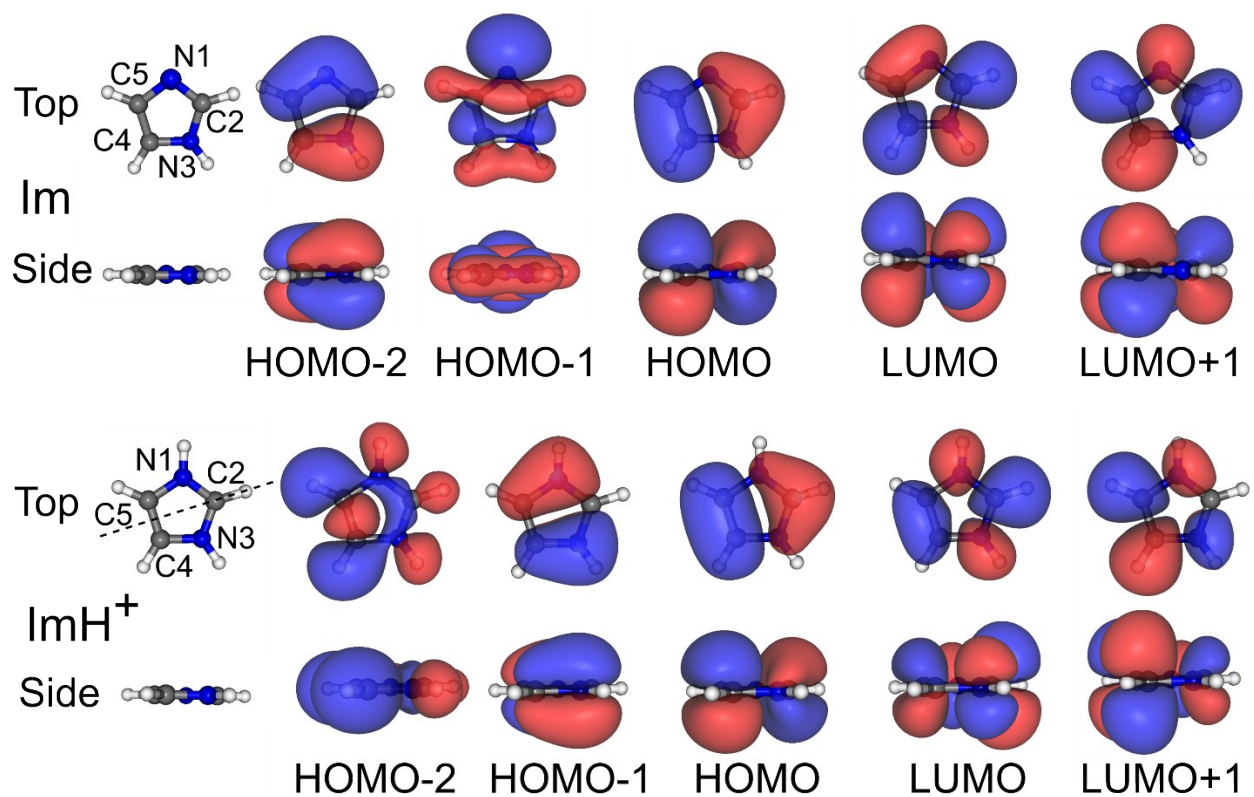

Figure S1: Calculated isodensity surfaces of the three highest occupied and two lowest unoccupied molecular orbitals of Im (top) and ImH<sup>+</sup> (bottom), respectively (isosurface value:  $\pm 0.02 \frac{e}{a_0^3}$ ).
